# Supplementary material for: Matchbox Janus membrane fog collector with highly efficient directional transport
Source: Royal Society of Chemistry journal article supplement (doi:10.1039/d4nh00458b), 2024-12-16
Supplement: d4nh00458b1.pdf [file d4nh00458b1.pdf]

## Supporting Information

### Laminated Janus Membrane Fog Collector with Special Wettability

Feifeng Hu <sup>a#</sup>, Huayang Zhang <sup>a#</sup>, Guangyi Tian <sup>a</sup>, Shangzhen XIE <sup>a\*</sup>, Zhiguang Guo <sup>\*a,b</sup>

*a* Ministry of Education Key Laboratory for the Green Preparation and Application of Functional Materials, Hubei University, Wuhan 430062, People's Republic of China.

*b* State Key Laboratory of Solid Lubrication, Lanzhou Institute of Chemical Physics, Chinese Academy of Sciences, Lanzhou 730000, People's Republic of China.

#### \*Corresponding Authors

Tel: 0086-931-4968105; Fax: 0086-931-8277088.

Email address: zguo@licp.cas.cn (Z Guo).

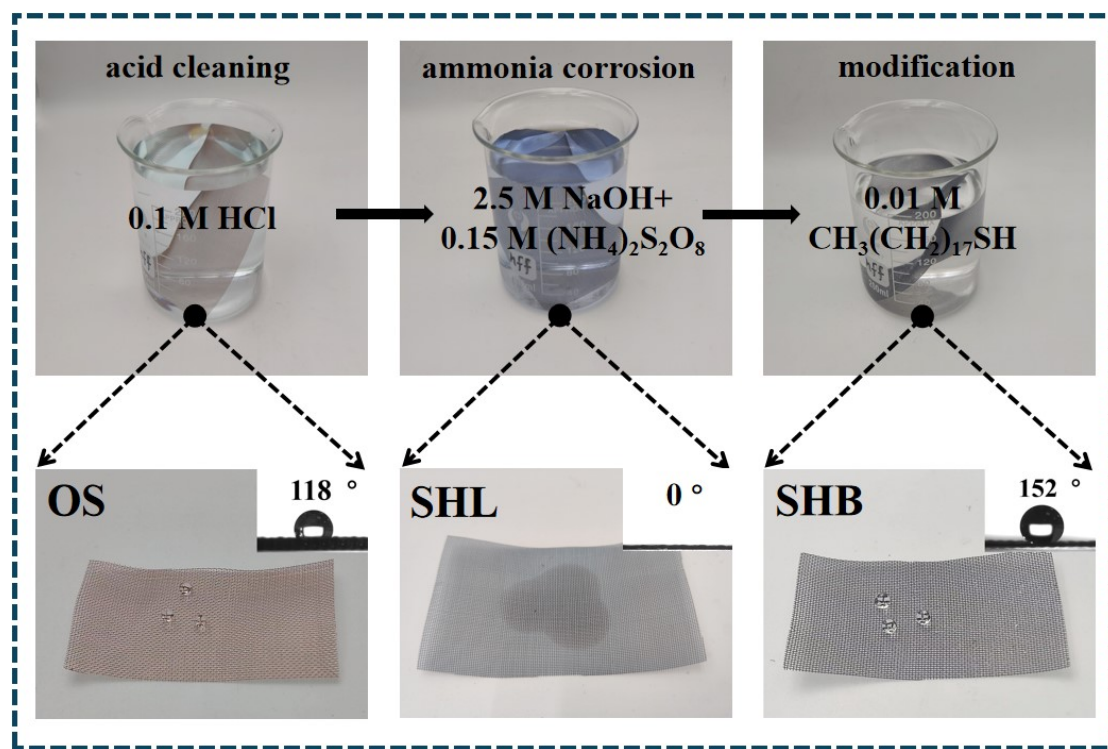

Figure. S1. Schematic diagram of the process of preparing superhydrophilic copper mesh by chemical etching and superhydrophobic copper mesh by thiol modification.

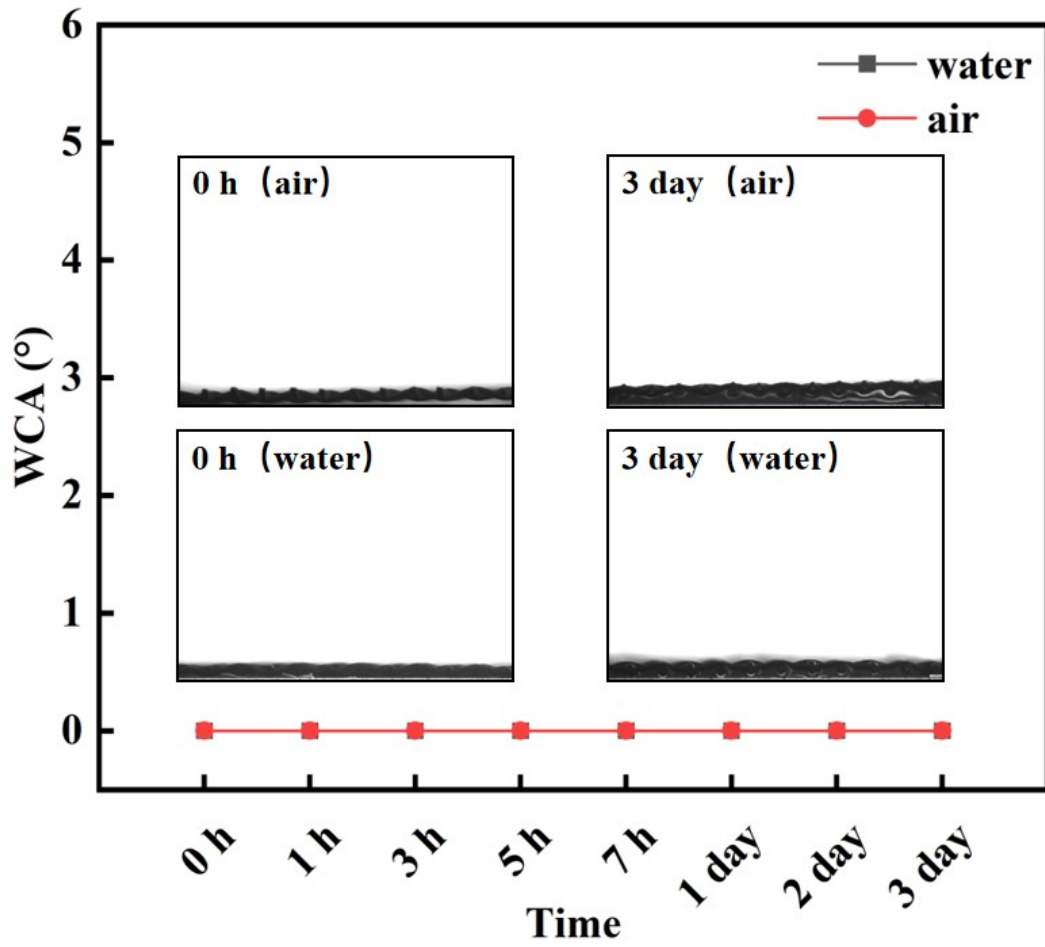

Figure. S2. Hydrophobic recovery of superhydrophilic mesh surfaces probing tests.

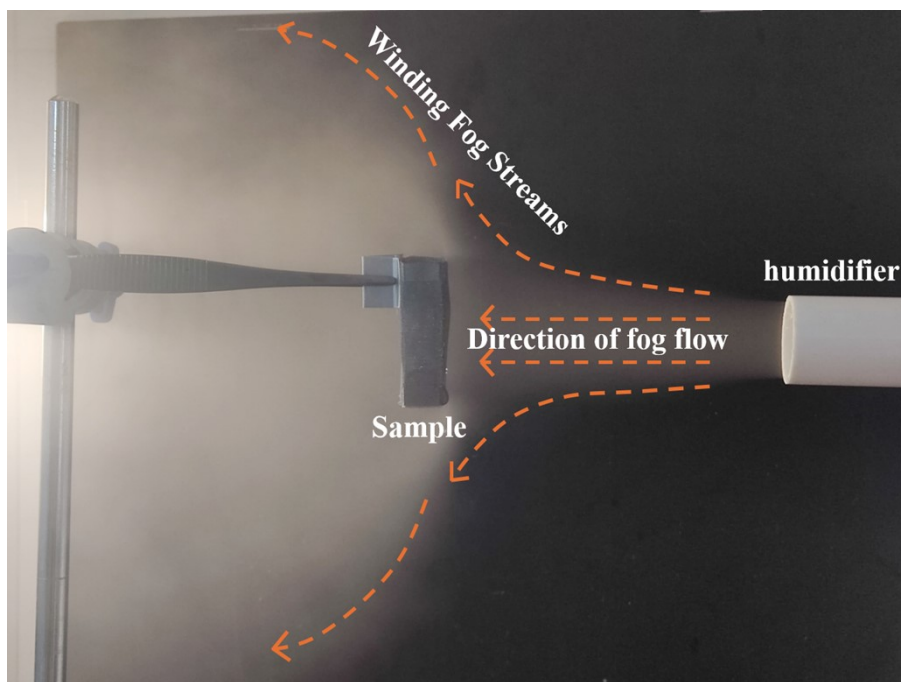

Figure. S3. Detour Flow Schematic.

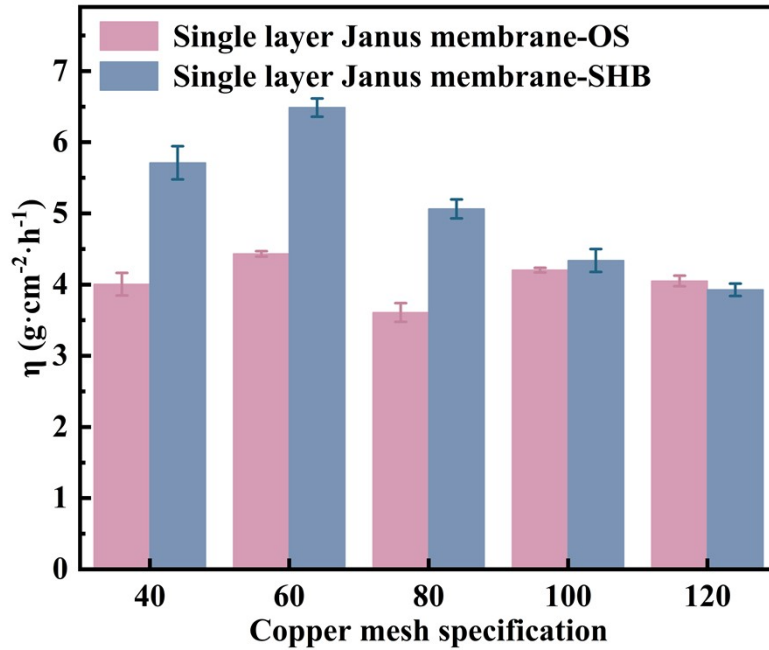

Figure. S4. Effect of copper mesh specification (grid aperture radius) on fog collection efficiency.

After cleaning, the surface of the original copper mesh was treated with ammonia etching to promote the growth of copper oxide on the surface, so as to modify it into a super hydrophilic surface. Then ODT was grafted to make -sulfhydryl (-SH) group superhydrophobic surface. The specific chemical reaction process is shown in the **Figure S5**.

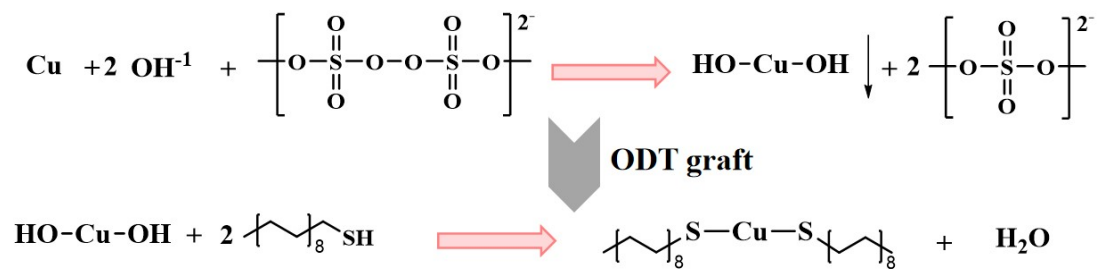

Figure. S5. Chemical reaction equations for ammonia-based etching and modification processes.

By analyzing EDS images of the copper mesh and EDS element normalization diagram of the local copper mesh (**Figure S6a-b**), it can be seen that the O content of SHL surface of the sample after ammonia etching of the original copper mesh OS increases significantly, and the surface is composed of uniformly distributed micro-nano needle

structures composed of  $\text{Cu}(\text{OH})_2$ . In addition, after hydrophobic modification of SHL copper mesh, the carbon content on the surface of the sample increased significantly, and the uniform distribution of C and S elements on the surface of the copper mesh could be clearly observed in the EDS image of **Figure 4-f**, which further confirmed that mercaptan was successfully grafted to the surface of  $\text{Cu}(\text{OH})_2$ , and SHB copper mesh was obtained.

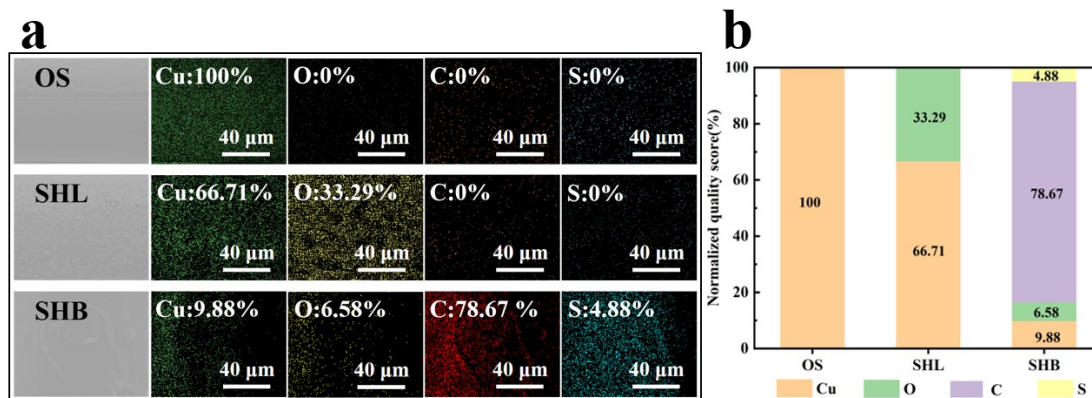

Figure. S6. (a)EDS element distribution of OS, SHL, SHB local image of copper mesh surface(b)Elemental normalization mapping of OS, SHL, SHB copper mesh surfaces.

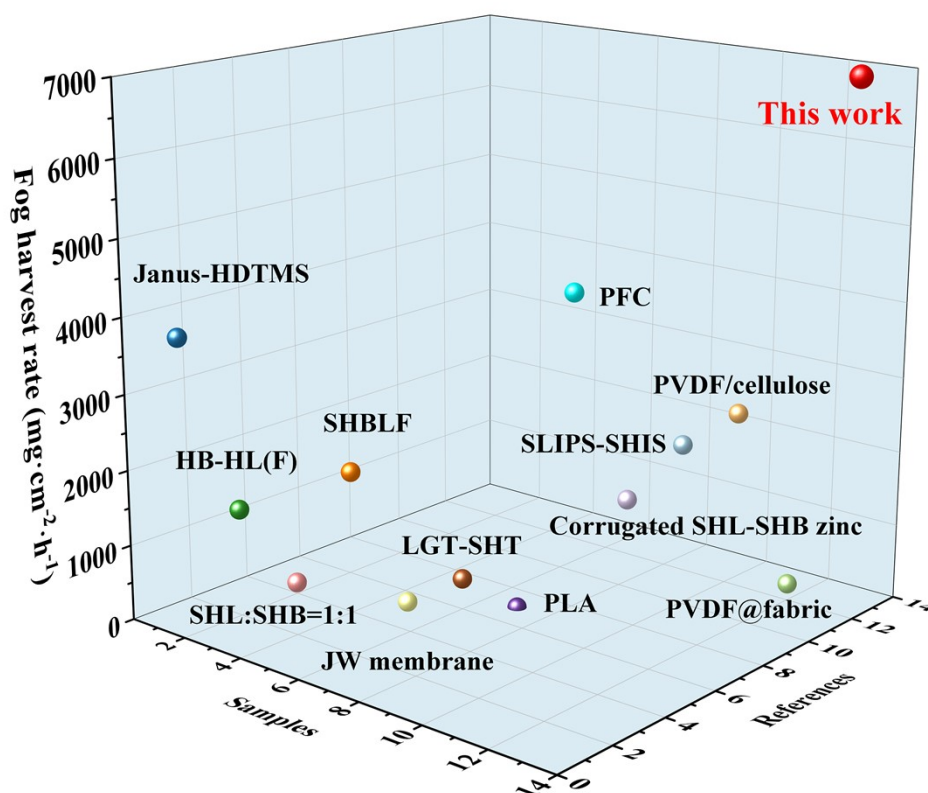

Figure. S7. Comparison of the catchment performance of the samples with other jobs [1-12].

**Reference :**

- [1] S. Zhu, Y. Liu, T. Bai, X. Shi, D. Li, L. Feng, High-efficient and robust fog collection through topography modulation, *Surface and Coatings Technology* 468 (2023). <https://doi.org/10.1016/j.surfcoat.2023.129747>.
- [2] M. Zhang, M. Xiao, C. Li, D. Li, J. Li, K. Yu, Y. Pan, Enhancing fog collection by optimizing wettability combination and fork-row collector arrangement: light and heavy fog, *Journal of Physics D: Applied Physics* 56(49) (2023). <https://doi.org/10.1088/1361-6463/acf8d3>.
- [3] J. Gao, Y. Song, L. Huang, H. Luo, X. Dong, C. Wang, J.A. Duan, Laser-Textured hybrid brass pattern array surface for high-efficiency fog collection, *Langmuir* 39(49) (2023) 18143-18151. <https://doi.org/10.1021/acs.langmuir.3c03056>.
- [4] H. Yue, Y. Fu, Z. Guo, Tetradecanoate in situ reaction prepares a stable and efficient 3D framework for fog collection, *Colloids and Surfaces A: Physicochemical and Engineering Aspects* 683 (2024). <https://doi.org/10.1016/j.colsurfa.2023.132994>.
- [5] K. Chen, J. Zhu, Y. Tan, F. Sun, J. Gan, H. Peng, T. Zhan, J. Lyu, Development of gradient-wetting Janus wood membrane with high-efficiency fog collection and oil-water separation, *Chemical Engineering Journal* 470 (2023). <https://doi.org/10.1016/j.cej.2023.144356>.
- [6] S. Liu, C. Sun, K. Zhang, Y. Geng, D. Yu, C. Wang, Fog collection efficiency of superhydrophobic surfaces with different water adhesion prepared by laser grid texturing, *Optics & Laser Technology* 172 (2024). <https://doi.org/10.1016/j.optlastec.2023.110523>.
- [7] Z. Shi, L. Liu, H. Chen, C. Tang, J. Yu, Y. Fan, Preparation of Janus film for fog water collection via layer-by-layer assembling of nanocellulose and nanochitin on PLA, *Carbohydr Polym* 323 (2024) 121369. <https://doi.org/10.1016/j.carbpol.2023.121369>.
- [8] D. Yan, Y. Chen, J. Liu, J. Song, Super-fast fog collector based on self-driven jet of mini fog droplets, *Small* 19(36) (2023) e2301745. <https://doi.org/10.1002/sml.202301745>.
- [9] Z. Peng, Y. Fu, Z. Guo, Origami-like 3D fog water harvester with hybrid wettability for efficient fog harvesting, *ACS Appl Mater Interfaces* 15(31) (2023) 38110-38123. <https://doi.org/10.1021/acsami.3c07343>.
- [10] R. Feng, F. Song, C. Xu, X.-L. Wang, Y.-Z. Wang, A Quadruple-Biomimetic surface for spontaneous and efficient fog harvesting, *Chemical Engineering Journal* 422 (2021). <https://doi.org/10.1016/j.cej.2021.130119>.
- [11] K. Yang, C. Duan, Z. Meng, Y. Liu, Y. Liu, Z. Xie, Y. Ni, Bioinspired construction of petal-like regenerated PVDF/cellulose fibers for efficient fog harvesting, *Carbohydr Polym* 335 (2024) 122069. <https://doi.org/10.1016/j.carbpol.2024.122069>.
- [12] R. Zhu, M. Liu, Y. Hou, L. Zhang, M. Li, D. Wang, D. Wang, S. Fu, Biomimetic fabrication of Janus fabric with asymmetric wettability for water purification and hydrophobic/hydrophilic patterned surfaces for fog harvesting, *ACS Appl Mater Interfaces* 12(44) (2020) 50113-50125. <https://doi.org/10.1021/acsami.0c12646>.
